# Supplementary material for: Thermo-oxidative aging of linear and branched alcohols as stability criterion for their use as e-fuels
Source: Royal Society of Chemistry journal article supplement (doi:10.1039/d4se00400k), 2024-01-01
Supplement: d4se00400k1.pdf [file d4se00400k1.pdf]

ARTICLE

## Thermo-oxidative aging of linear and branched alcohols as stability criterion for their use as e-fuels

Received 00th March 20xx,  
Accepted 00th March 20xx

### Supplementary Information

DOI: 10.1039/x0xx00000x

Anne Lichtinger,<sup>a</sup> Maximilian J. Poller,<sup>a</sup>  Olaf Schröder,<sup>b</sup> Julian Türck,<sup>c,d</sup> Thomas Garbe,<sup>e,g</sup> Jürgen Krahl,<sup>f,g</sup> Markus Jakob<sup>b</sup> and Jakob Albert<sup>\*a</sup>

Keywords: e-fuels, regenerative fuels, alcohols, carbon mass balancing, aging reaction mechanism, oxidation

### 1. Carbon mass fraction

**Table S1:** Carbon mass fraction after 120 h aging of 1-hexanol, 1-octanol and 2-hexanol.

| aging product    | carbon mass fraction (after 120 h) [m%] | aging educt |
|------------------|-----------------------------------------|-------------|
| 1-hexanol        | 63.21                                   | 1-hexanol   |
| hexanal          | 0.859                                   | 1-hexanol   |
| hexanoic acid    | 6.25                                    | 1-hexanol   |
| hexyl hexanoate  | 13.93                                   | 1-hexanol   |
| hexyl formate    | 1.34                                    | 1-hexanol   |
| hexyl acetate    | 0.135                                   | 1-hexanol   |
| hexyl propanoate | 0.0445                                  | 1-hexanol   |
| hexyl butanoate  | 0.221                                   | 1-hexanol   |
| 1-pentanol       | 0.917                                   | 1-hexanol   |
| pentanoic acid   | 1.73                                    | 1-hexanol   |
| carbon dioxide   | 3.10                                    | 1-hexanol   |
| other products   | 8.26                                    | 1-hexanol   |
| 1-octanol        | 56.92                                   | 1-octanol   |
| octanal          | 0.56                                    | 1-octanol   |

|                 |       |           |
|-----------------|-------|-----------|
| octanoic acid   | 6.99  | 1-octanol |
| octyl octanoate | 16.32 | 1-octanol |
| octyl formate   | 2.18  | 1-octanol |
| octyl acetate   | 1.26  | 1-octanol |
| octyl butanoate | 0.39  | 1-octanol |
| 1-heptanol      | 0.26  | 1-octanol |
| heptanoic acid  | 0.76  | 1-octanol |
| 1-hexanol       | 0.013 | 1-octanol |
| hexanoic acid   | 0.092 | 1-octanol |
| 1-pentanol      | 0.011 | 1-octanol |
| pentanoic acid  | 0.17  | 1-octanol |
| carbon dioxide  | 3.07  | 1-octanol |
| other products  | 11.00 | 1-octanol |
| 2-hexanol       | 80.33 | 2-hexanol |
| 2-hexanone      | 10.09 | 2-hexanol |
| acetic acid     | 0.032 | 2-hexanol |
| carbon dioxide  | 1.40  | 2-hexanol |

<sup>a</sup> Hamburg University, Institute of Technical and Macromolecular Chemistry, Bundesstrasse 45, 20146 Hamburg, Germany

<sup>b</sup> Coburg University of Applied Sciences and Arts, Friedrich-Streib-Strasse 2, 96450 Coburg, Germany

<sup>c</sup> Leuphana University, Universitaetsallee 1, 21335 Lueneburg, Germany.

<sup>d</sup> TECOSOL GmbH, Jahnstrasse 2, 97199 Ochsenfurt, Germany

<sup>e</sup> Volkswagen AG, Berliner Ring 2, 38440 Wolfsburg, Germany

<sup>f</sup> OWL University of Applied Sciences and Arts, Campusallee 12, 32657 Lemgo, Germany

<sup>g</sup> FUELS JOINT RESEARCH GROUP, www.fuels-jrg.de, Germany

\* E-Mail: jakob.albert@uni-hamburg.de
